# Supplementary material for: Intellectual disability‐associated gene ftsj1 is responsible for 2′‐O‐methylation of specific tRNAs
Source: PubMed Central journal article supplement (PMC7403668; doi:10.15252/embr.202050095), 2020-06-18
Supplement: EMBR-21-e50095-s001.pdf [file EMBR-21-e50095-s001.pdf]

## Appendix

### Contents on the first page

**Appendix Figure S1.** IP assays of FTSJ1-Flag. The empty vector was transfected as a control.

**Appendix Figure S2.** The knockout efficiency of *ftsj1* and *wdr6*.

**Appendix Figure S3.** Secondary structures of *S. cerevisiae* and *S. pombe* tRNA<sup>Phe</sup>(GAA).

**Appendix Table S1.** List of potential FTSJ1-interacting proteins identified by IP-MS analysis.

**Appendix Table S2.** List of potential FTSJ1-interacting proteins identified by unnatural amino acid photocrosslinking-IP-MS analysis.

**Appendix Table S3.** Information about the 17 human cytoplasmic G37-tRNA species.

**Appendix Table S4.** Quantification of the Nm/A ratios in 16 G37-tRNAs after incubation with FTSJ1-WDR6 by UPLC-MS/MS analysis.

**Appendix Table S5.** Constructs used in this study.

**Appendix Table S6.** The biotinylated DNA probes for fishing tRNAs.

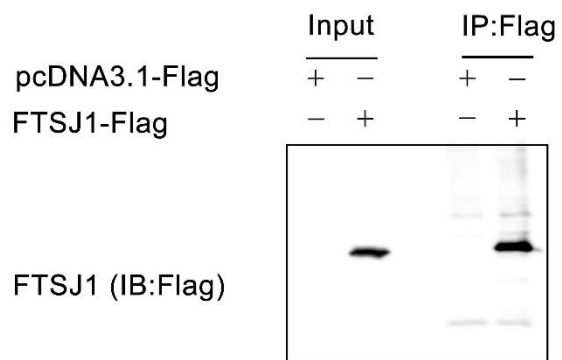

**Appendix Figure S1.** IP assays of FTSJ1-Flag. The empty vector was transfected as a control.

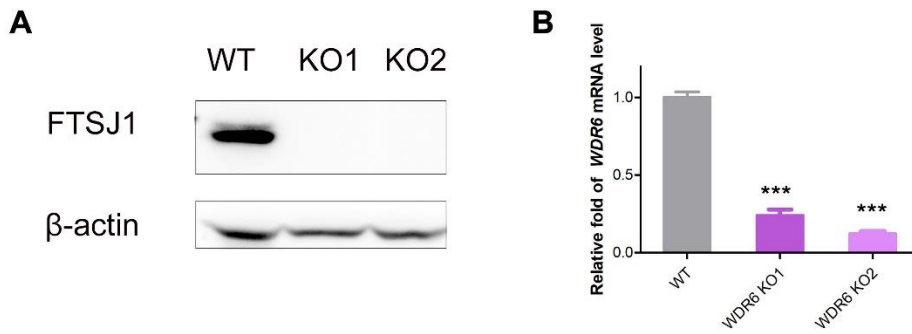

**Appendix Figure S2.** The knockout efficiency of *ftsj1* and *wdr6*.

(A) The western blotting to show *ftsj1* knockout efficiency. (B) QRT-PCR to show *wdr6* knockout efficiency. Error bars represent the standard deviation of three independent experiments. p values were determined using two-tailed Student's t-test for paired samples. \*p < 0.05, \*\*p < 0.01, \*\*\*p < 0.001. n.s., no significance.

*S. cerevisiae* tRNA<sup>Phe</sup>(GAA)

*S. pombe* tRNA<sup>Phe</sup>(GAA)

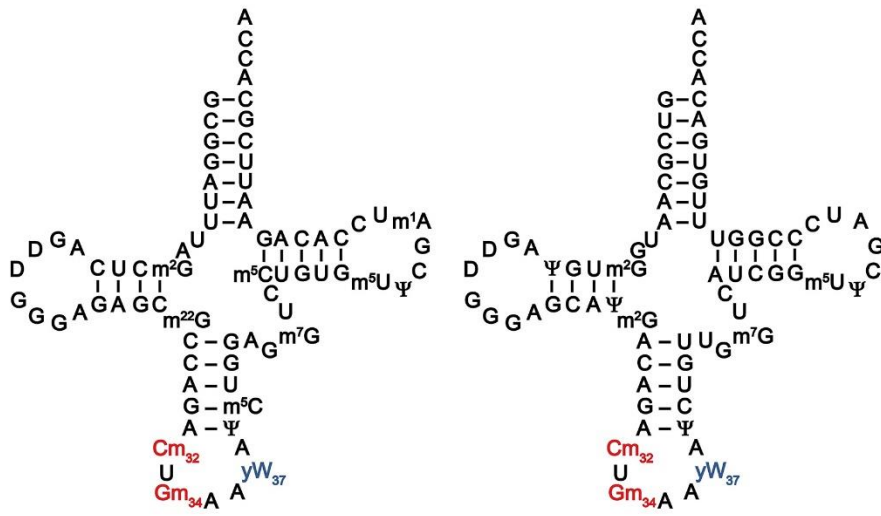

**Appendix Figure S3.** Secondary structures of *S. cerevisiae* and *S. pombe* tRNA<sup>Phe</sup>(GAA).

**Appendix Table S1.** List of potential FTSJ1-interacting proteins identified by IP-MS analysis.

|    | Swiss-Prot ID | Gene Symbol | Description                                                                              |
|----|---------------|-------------|------------------------------------------------------------------------------------------|
| 1  | P0DMV9        | HSP1A       | Heat shock 70 kDa protein 1B                                                             |
| 2  | B4DNT8        |             | cDNA FLJ54370, highly similar to Heat shock 70 kDa protein 1                             |
| 3  | Q00610        | CLTC        | Clathrin heavy chain 1                                                                   |
| 4  | P23246        | SFPQ        | Splicing factor, proline- and glutamine-rich                                             |
| 5  | B4DI39        |             | cDNA FLJ54328, highly similar to Heat shock 70 kDa protein 1                             |
| 6  | Q86VG2        |             | Splicing factor proline/glutamine-rich (Polypyrimidine tract binding protein associated) |
| 7  | G8JLB6        | HNRNPH1     | Heterogeneous nuclear ribonucleoprotein H                                                |
| 8  | Q15233        | NONO        | Non-POU domain-containing octamer-binding protein                                        |
| 9  | V9HW22        | HEL-S-72p   | Epididymis luminal protein 33                                                            |
| 10 | P49750        | YLPM1       | YLP motif-containing protein 1                                                           |
| 11 | P78371        | CCT2        | T-complex protein 1 subunit beta containing TCP1, subunit 2 (Beta), isoform CRA_b        |
| 12 | Q9UET6        | FTSJ1       | Putative tRNA (cytidine(32)/guanosine(34)-2'-O)-methyltransferase                        |
| 13 | Q8NF45        | FLJ00353    | FLJ00353 protein                                                                         |
| 14 | P38646        | HSPA9       | Stress-70 protein, mitochondrial                                                         |
| 15 | O00571        | DDX3X       | ATP-dependent RNA helicase DDX3X                                                         |
| 16 | V9HW37        | HEL-S-69    | Epididymis secretory protein Li 69                                                       |
| 17 | P50990        | CCT8        | T-complex protein 1 subunit theta                                                        |
| 18 | P40227        | CCT6A       | T-complex protein 1 subunit zeta                                                         |
| 19 | P11021        | HSPA5       | Endoplasmic reticulum chaperone BiP                                                      |
| 20 | P22626        | HNRNPA2B1   | Heterogeneous nuclear ribonucleoproteins A2/B1                                           |
| 21 | P35658        | NUP214      | Nuclear pore complex protein Nup214                                                      |
| 22 | Q5JP53        | TUBB        | Tubulin beta chain                                                                       |
| 23 | Q53HV2        |             | T-complex protein 1 subunit eta                                                          |
| 24 | P17987        | TCP1        | T-complex protein 1 subunit alpha                                                        |
| 25 | P49368        | CCT3        | T-complex protein 1 subunit gamma                                                        |
| 26 | F8VU51        | YLPM1       | YLP motif-containing protein 1                                                           |
| 27 | P50991        | CCT4        | T-complex protein 1 subunit delta                                                        |
| 28 | P68371        | TUBB4B      | Tubulin beta-4B chain                                                                    |
| 29 | Q53FA3        | HSPA1L      | Heat shock 70 kDa protein 1-like (Fragment)                                              |
| 30 | B7Z9L0        |             | T-complex protein 1 subunit delta                                                        |
| 31 | Q9BVA1        | TUBB2B      | Tubulin beta-2B chain                                                                    |
| 32 | P55795        | HNRNPH2     | Heterogeneous nuclear ribonucleoprotein H2                                               |
| 33 | H0Y9K7        | SFPQ        | Splicing factor, proline- and glutamine-rich (Fragment)                                  |

|    |            |         |                                                                                                            |
|----|------------|---------|------------------------------------------------------------------------------------------------------------|
| 34 | Q92499     | DDX1    | ATP-dependent RNA helicase DDX1                                                                            |
| 35 | O15042     | U2SURP  | U2 snRNP-associated SURP motif-containing protein                                                          |
| 36 | Q92841     | DDX17   | Probable ATP-dependent RNA helicase DDX17                                                                  |
| 37 | Q7Z6Z7     | HUWE1   | E3 ubiquitin-protein ligase HUWE1                                                                          |
| 38 | Q9Y3I0     | RTCB    | tRNA-splicing ligase RtcB homolog                                                                          |
| 39 | J3KTA4     | DDX5    | Probable ATP-dependent RNA helicase DDX5                                                                   |
| 40 | F8VPD4     | CAD     | CAD protein                                                                                                |
| 41 | P09651     | HNRPA1  | Heterogeneous nuclear ribonucleoprotein A1                                                                 |
| 42 | Q02809     | PLOD1   | Procollagen-lysine,2-oxoglutarate 5-dioxygenase 1                                                          |
| 43 | P09651     | HNRNPA1 | Heterogeneous nuclear ribonucleoprotein A1                                                                 |
| 44 | P04350;    | TUBB4A  | Tubulin beta-4A chain                                                                                      |
| 45 | O75533;    | SF3B1   | Splicing factor 3B subunit 1                                                                               |
| 46 | P68363     | TUBA1B  | Tubulin alpha-1B chain 1A                                                                                  |
| 47 | Q9BQE3     | TUBA1C  | Tubulin alpha-1C chain                                                                                     |
| 48 | P14866     | HNRNPL  | Heterogeneous nuclear ribonucleoprotein L                                                                  |
| 49 | Q15393;    | SF3B3   | Splicing factor 3B subunit 3                                                                               |
| 50 | H0YBG7     | HNRNPH1 | Heterogeneous nuclear ribonucleoprotein H (Fragment)                                                       |
| 51 | Q01844;    | EWSR1   | RNA-binding protein EWS                                                                                    |
| 52 | P33993;    | MCM7    | DNA replication licensing factor MCM7                                                                      |
| 53 | P61978     | HNRNPK  | Heterogeneous nuclear ribonucleoprotein K                                                                  |
| 54 | Q92734     | TFG     | Protein TFG                                                                                                |
| 55 | Q9BTE3;    | MCMBP   | Mini-chromosome maintenance complex-binding protein                                                        |
| 56 | P33992     | MCM5    | DNA replication licensing factor MCM5                                                                      |
| 57 | Q13509     | TUBB3   | Tubulin beta-3 chain                                                                                       |
| 58 | Q13435     | SF3B2   | Splicing factor 3B subunit 2                                                                               |
| 59 | Q2NKY5     | TUBB6   | TUBB6 protein                                                                                              |
| 60 | Q8IXB1;    | DNAJC10 | DnaJ homolog subfamily C member 10                                                                         |
| 61 | Q9H0D6     | XRN2    | 5'-3' exoribonuclease 2                                                                                    |
| 62 | P52597     | HNRNPF  | Heterogeneous nuclear ribonucleoprotein F                                                                  |
| 63 | P15924;    | DSP     | Desmoplakin                                                                                                |
| 64 | B2R802     |         | cDNA, FLJ93681, highly similar to Homo sapiens small nuclear ribonucleoprotein polypeptide A (SNRPA), mRNA |
| 65 | A0A024QZD5 | SNRP70  | Small nuclear ribonucleoprotein 70kDa polypeptide (RNP antigen), isoform CRA_b                             |
| 66 | P04637     | TP53    | Cellular tumor antigen p53                                                                                 |
| 67 | Q4VCS5;    | AMOT    | Angiomotin                                                                                                 |
| 68 | Q9C0J8;    | WDR33   | pre-mRNA 3' end processing protein WDR33                                                                   |
| 69 | Q8WXF1     | PSPC1   | Paraspeckle component 1                                                                                    |
| 70 | P35637     | FUS     | RNA-binding protein FUS                                                                                    |

|     |            |         |                                                                          |
|-----|------------|---------|--------------------------------------------------------------------------|
| 71  | P24928     | POLR2A  | DNA-directed RNA polymerase II subunit<br>RPB1                           |
| 72  | B3KUD7     | MCM7    | NA replication licensing factor MCM7                                     |
| 73  | Q9NNW5     | WDR6    | WD repeat-containing protein 6                                           |
| 74  | P19338     | NCL     | Nucleolin                                                                |
| 75  | Q10570     | CPSF1   | Cleavage and polyadenylation specificity factor<br>subunit 1             |
| 76  | B4E3A4     |         | cDNA FLJ57283, highly similar to Actin,<br>cytoplasmic 2                 |
| 77  | Q86X55;    | CARM1   | Histone-arginine methyltransferase CARM1                                 |
| 78  | Q99567;    | NUP88   | Nuclear pore complex protein Nup88                                       |
| 79  | Q5RLJ0     |         | CLE                                                                      |
| 80  | P11940     | PABPC1  | Polyadenylate-binding protein 1                                          |
| 81  | D3DWL9     | CPSF1   | Cleavage and polyadenylation specific factor 1,<br>160kDa, isoform CRA_a |
| 82  | P05387     | RPLP2   | 60S acidic ribosomal protein P2                                          |
| 83  | P63104     | YWHAZ   | 14-3-3 protein zeta/delta                                                |
| 84  | B4DZW4     |         | Polyadenylate-binding protein                                            |
| 85  | O14654;    | IRS4    | Insulin receptor substrate 4                                             |
| 86  | P17066;    | HSPA6   | Heat shock 70 kDa protein 6                                              |
| 87  | A0A024RDP4 | PSPC1   | Paraspeckle component 1, isoform CRA_b                                   |
| 88  | P30876     | POLR2B  | DNA-directed RNA polymerase II subunit<br>RPB2                           |
| 89  | Q4LE79     | DSP     | DSP variant protein (Fragment)                                           |
| 90  | Q86YZ3;    | HRNR    | Hornerin                                                                 |
| 91  | P49411;    | TUFM    | Elongation factor Tu, mitochondrial                                      |
| 92  | Q8NCA5;    | FAM98A  | Protein FAM98A                                                           |
| 93  | P52272     | HNRNPM  | Heterogeneous nuclear ribonucleoprotein M                                |
| 94  | Q8IWX8     | CHERP   | Calcium homeostasis endoplasmic reticulum<br>protein                     |
| 95  | P25705     | ATP5A1  | ATP synthase subunit alpha, mitochondrial                                |
| 96  | Q9BUF5     | TUBB6   | Tubulin beta-6 chain                                                     |
| 97  | Q99700;    | ATXN2   | Ataxin-2                                                                 |
| 98  | P21333     | FLNA    | Filamin-A                                                                |
| 99  | O43143     | DHX15   | Pre-mRNA-splicing factor ATP-dependent RNA<br>helicase DHX15             |
| 100 | Q08211;    | DHX9    | ATP-dependent RNA helicase A                                             |
| 101 | Q15149;    | PLEC    | Plectin                                                                  |
| 102 | Q96I25     | RBM17   | Splicing factor 45                                                       |
| 103 | O43823;    | AKAP8   | A-kinase anchor protein 8                                                |
| 104 | Q14444;    | CAPRIN1 | Caprin-1                                                                 |
| 105 | Q00839     | HNRNPU  | Heterogeneous nuclear ribonucleoprotein U                                |
| 106 | Q52LJ0;    | FAM98B  | Protein FAM98B                                                           |
| 107 | P51991;    | HNRNPA3 | Heterogeneous nuclear ribonucleoprotein A3                               |

**Appendix Table S2.** List of potential FTSJ1-interacting proteins identified by unnatural amino acid photocrosslinking-IP-MS analysis.

|    | Swiss-Prot ID | Gene Symbol | Description                                                       |
|----|---------------|-------------|-------------------------------------------------------------------|
| 1  | Q9NNW5        | WDR6        | WD repeat-containing protein 6                                    |
| 2  | O14654        | IRS4        | Insulin receptor substrate 4                                      |
| 3  | P51532        | SMARCA4     | Transcription activator BRG1                                      |
| 4  | Q9UET6        | FTSJ1       | Putative tRNA (cytidine(32)/guanosine(34)-2'-O)-methyltransferase |
| 5  | Q99729-3      | HNRNPAB     | Isoform 3 of Heterogeneous nuclear ribonucleoprotein A/B          |
| 6  | O14979-2      | HNRNPDL     | Isoform 2 of Heterogeneous nuclear ribonucleoprotein D-like       |
| 7  | P16403        | HIST1H1C    | Histone H1.2                                                      |
| 8  | P31483        | TIA1        | Nucleolysin TIA-1 isoform p40                                     |
| 9  | Q01085-2      | TIAL1       | Isoform 2 of Nucleolysin                                          |
| 10 | Q04837        | SSBP1       | Single-stranded DNA-binding protein, mitochondrial                |
| 11 | Q00325-2      | SLC25A3     | Isoform B of Phosphate carrier protein, mitochondrial             |
| 12 | Q9BTE3        | MCMBP       | Mini-chromosome maintenance complex-binding protein               |
| 13 | P04350        | TUBB4A      | Tubulin beta-4A chain                                             |
| 14 | Q9BUF5        | TUBB6       | Tubulin beta-6 chain                                              |
| 15 | Q15366-2      | PCBP2       | Isoform 2 of Poly(rC)-binding protein 2                           |
| 16 | Q13247        | SRSF6       | Serine/arginine-rich splicing factor 6                            |
| 17 | P01605        | IGKV1D-33   | Immunoglobulin kappa variable 1D-33                               |
| 18 | Q01650        | SLC7A5      | Large neutral amino acids transporter small subunit 1             |
| 19 | Q7Z2W4        | ZC3HAV1     | Zinc finger CCCH-type antiviral protein 1                         |
| 20 | P10809        | HSPD1       | 60 kDa heat shock protein, mitochondrial                          |
| 21 | P07900-2      | HSP90AA1    | Isoform 2 of Heat shock protein HSP 90-alpha OS                   |
| 22 | Q71U36        | TUBA1A      | Tubulin alpha-1A chain                                            |
| 23 | P12236        | SLC25A6     | ADP/ATP translocase 3                                             |
| 24 | Q9BQ39        | DDX50       | ATP-dependent RNA helicase DDX50                                  |
| 25 | Q13243        | SRSF5       | Serine/arginine-rich splicing factor 5                            |
| 26 | O00264        | PGRMC1      | Membrane-associated progesterone receptor component 1             |
| 27 | P20674        | COX5A       | Cytochrome c oxidase subunit 5A, mitochondrial                    |
| 28 | P63173        | RPL38       | 60S ribosomal protein L38                                         |
| 29 | P30954        | OR10J1      | Olfactory receptor 10J1                                           |
| 30 | O60783        | MRPS14      | 28S ribosomal protein S14, mitochondrial                          |
| 31 | Q9GZQ3        | COMMD5      | COMM domain-containing protein 5                                  |
| 32 | P51843        | NR0B1       | Nuclear receptor subfamily 0 group B member 1                     |
| 33 | Q9NX58        | LYAR        | Cell growth-regulating nucleolar protein                          |



|    |          |          |                                                                  |
|----|----------|----------|------------------------------------------------------------------|
| 34 | P82932   | MRPS6    | 28S ribosomal protein S6, mitochondrial                          |
| 35 | O75908-3 | SOAT2    | Isoform 3 of Sterol O-acyltransferase 2                          |
| 36 | Q9UNA1   | ARHGAP26 | Rho GTPase-activating protein 26                                 |
| 37 | Q8N5I4   | DHR SX   | Dehydrogenase/reductase SDR family member on chromosome X        |
| 38 | Q99832   | CCT7     | T-complex protein 1 subunit eta                                  |
| 39 | Q9UKF6   | CPSF3    | Cleavage and polyadenylation specificity factor subunit 3        |
| 40 | P02745   | C1QA     | Complement C1q subcomponent subunit A                            |
| 41 | Q14246   | ADGRE1   | Adhesion G protein-coupled receptor E1                           |
| 42 | P52292   | KPNA2    | Importin subunit alpha-1                                         |
| 43 | Q8WUZ0-2 | BCL7C    | Isoform 2 of B-cell CLL/lymphoma 7 protein family member C       |
| 44 | P40227   | CCT6A    | T-complex protein 1 subunit zeta                                 |
| 45 | P35613   | BSG      | Basigin                                                          |
| 46 | Q6PK04   | CCDC137  | Coiled-coil domain-containing protein 137                        |
| 47 | Q9BU76   | MMTAG2   | Multiple myeloma tumor-associated protein 2                      |
| 48 | P10243   | MYBL1    | Myb-related protein A                                            |
| 49 | Q9Y5S1   | TRPV2    | Transient receptor potential cation channel subfamily V member 2 |
| 50 | Q08999   | RBL2     | Retinoblastoma-like protein 2                                    |
| 51 | O94979-8 | SEC31A   | Isoform 8 of Protein transport protein                           |
| 52 | Q9Y383   | LUC7L2   | Putative RNA-binding protein Luc7-like 2                         |
| 53 | P13639   | EEF2     | Elongation factor 2                                              |
| 54 | P33993   | MCM7     | DNA replication licensing factor MCM7                            |
| 55 | Q9Y4P3   | TBL2     | Transducin beta-like protein 2                                   |
| 56 | P61619   | SEC61A1  | Protein transport protein Sec61 subunit alpha isoform 1          |
| 57 | Q68CZ2   | TNS3     | Tensin-3                                                         |
| 58 | O14980   | XPO1     | Exportin-1                                                       |
| 59 | Q9Y2X0   | MED16    | Mediator of RNA polymerase II transcription subunit 16           |
| 60 | Q6P158   | DHX57    | Putative ATP-dependent RNA helicase DHX57                        |
| 61 | O14917   | PCDH17   | Protocadherin-17                                                 |
| 62 | P25705   | ATP5A1   | ATP synthase subunit alpha, mitochondrial                        |
| 63 | Q5T9A4   | ATAD3B   | ATPase family AAA domain-containing protein 3B                   |
| 64 | Q9Y2I1   | NISCH    | Nischarin                                                        |
| 65 | P57678   | GEMIN4   | Gem-associated protein 4                                         |

**Appendix Table S3.** Information about the 17 human cytoplasmic G37-tRNA species.

| 17 G37-tRNAs        |                           | Site 32 | Site 34 |
|---------------------|---------------------------|---------|---------|
| tRNA <sup>Arg</sup> | tRNA <sup>Arg</sup> (ACG) | C32     | A34     |
|                     | -(CCG)                    | U32     | C34     |
|                     | -(UCG)                    | C32     | U34     |

|                           |                           |     |     |
|---------------------------|---------------------------|-----|-----|
| tRNA <sup>Cys</sup> (GCA) | tRNA <sup>Cys</sup> (GCA) | C32 | G34 |
| tRNA <sup>His</sup> (GUG) | tRNA <sup>His</sup> (GUG) | U32 | G34 |
| tRNA <sup>Leu</sup>       | tRNA <sup>Leu</sup> (AAG) | U32 | A34 |
|                           | -(CAA)                    | C32 | C34 |
|                           | -(CAG)                    | U32 | C34 |
|                           | -(UAA)                    | C32 | U34 |
|                           | -(UAG)                    | U32 | U34 |
| tRNA <sup>Phe</sup> (GAA) | tRNA <sup>Phe</sup> (GAA) | C32 | G34 |
| tRNA <sup>Pro</sup>       | tRNA <sup>Pro</sup> (AGG) | U32 | A34 |
|                           | -(CGG)                    | U32 | C34 |
|                           | -(UGG)                    | U32 | U34 |
| tRNA <sup>Trp</sup> (CCA) | tRNA <sup>Trp</sup> (CCA) | C32 | C34 |
| tRNA <sup>Tyr</sup>       | tRNA <sup>Tyr</sup> (AUA) | C32 | A34 |
|                           | -(GUA)                    | C32 | G34 |

**Appendix Table S4.** Quantification of the Nm/A ratios in 16 G37-tRNAs after incubation with FTSJ1-WDR6 by UPLC-MS/MS analysis.

| tRNAs                                                 | Am/A% | Cm/A% | Gm/A%     | Um/A% | m <sup>1</sup> G/A% |
|-------------------------------------------------------|-------|-------|-----------|-------|---------------------|
| m <sup>1</sup> G37_tRNA <sup>Arg</sup> ( <u>A</u> CG) | n.d.  |       |           |       | 5.21±0.24           |
| m <sup>1</sup> G37_tRNA <sup>Arg</sup> ( <u>C</u> CG) |       | n.d.  |           |       | 0.34±0.01           |
| m <sup>1</sup> G37_tRNA <sup>Arg</sup> ( <u>U</u> CG) |       |       |           | n.d.  | 0.92±0.08           |
| m <sup>1</sup> G37_tRNA <sup>Cys</sup> ( <u>G</u> CA) |       |       | n.d.      |       | 1.38±0.06           |
| m <sup>1</sup> G37_tRNA <sup>His</sup> ( <u>G</u> UG) |       |       | n.d.      |       | 6.67±0.15           |
| m <sup>1</sup> G37_tRNA <sup>Leu</sup> ( <u>A</u> AG) | n.d.  |       |           |       | 6.89±0.67           |
| m <sup>1</sup> G37_tRNA <sup>Leu</sup> ( <u>U</u> AG) |       |       |           | n.d.  | 7.05±0.28           |
| m <sup>1</sup> G37_tRNA <sup>Leu</sup> ( <u>C</u> AG) |       | n.d.  |           |       | 3.01±0.45           |
| m <sup>1</sup> G37_tRNA <sup>Leu</sup> ( <u>U</u> AA) |       |       |           | n.d.  | 4.99±0.28           |
| m <sup>1</sup> G37_tRNA <sup>Pro</sup> ( <u>A</u> GG) | n.d.  |       |           |       | 8.53±0.32           |
| m <sup>1</sup> G37_tRNA <sup>Pro</sup> ( <u>C</u> GG) |       | n.d.  |           |       | 8.37±0.22           |
| m <sup>1</sup> G37_tRNA <sup>Pro</sup> ( <u>U</u> GG) |       |       |           | n.d.  | 2.70±0.10           |
| m <sup>1</sup> G37_tRNA <sup>Phe</sup> ( <u>G</u> AA) |       |       | 0.75±0.04 |       | 2.26±0.20           |
| m <sup>1</sup> G37_tRNA <sup>Trp</sup> ( <u>C</u> CA) |       | n.d.  |           |       | 5.73±0.11           |
| m <sup>1</sup> G37_tRNA <sup>Tyr</sup> ( <u>G</u> UA) |       |       | n.d.      |       | 5.47±0.50           |
| m <sup>1</sup> G37_tRNA <sup>Tyr</sup> ( <u>A</u> UA) | n.d.  |       |           |       | 3.35±0.12           |

The results are the average of three independent repeats with standard deviations indicated. n.d., not detected.

**Appendix Table S5.** Constructs used in this study.

| Proteins                              | Tag              | Position   | Vector    |
|---------------------------------------|------------------|------------|-----------|
| <b>For expression in insect cells</b> |                  |            |           |
| FTSJ1                                 | His <sub>6</sub> | C-terminus | pFastbac1 |
| WDR6                                  | GST              | N-terminus | pFastbac1 |

| TrmD                                                                      | His <sub>6</sub> | N-terminus | pET28a   |
|---------------------------------------------------------------------------|------------------|------------|----------|
| <b>For expression in HEK293T cells</b>                                    |                  |            |          |
| FTSJ1                                                                     | Flag             | C-terminus | pcDNA3.1 |
| FTSJ1- $\Delta$ N19, - $\Delta$ C39, -220, -241, -256<br>and -Asn221DIZPK |                  |            |          |
| WDR6                                                                      | HA               | C-terminus | pcDNA3.1 |
| <b>For immunofluorescence analysis</b>                                    |                  |            |          |
| FTSJ1                                                                     | Flag             | C-terminus | pcDNA3.1 |

**Appendix Table S6.** The biotinylated DNA probes for fishing tRNAs.

| tRNAs                                           | Probes                                   |
|-------------------------------------------------|------------------------------------------|
| tRNA <sup>Arg</sup> (ACG)                       | 5'biotin-CAGACGCGTTATCCATTGCGCCACTGGCCC  |
| tRNA <sup>Arg</sup> (CCG)                       | 5'biotin-TGGCGACCACGAAGGGACTCGAACCCCTCAA |
| tRNA <sup>Arg</sup> (UCG)                       | 5'biotin-TGGCGAGCCAGCCAGGAGTCGAACCTGGAA  |
| tRNA <sup>Cys</sup> (GCA)                       | 5'biotin-TCAAATGCTCTACCACTGAGCTATGCCCCC  |
| tRNA <sup>His</sup> (GUG)                       | 5'biotin-GCAGAGTACTAACCACTATAACGATCACGGC |
| tRNA <sup>Leu</sup> (UAA)                       | 5'biotin-CCAACGCCTTAACCACTCGGCCATCCCGGT  |
| tRNA <sup>Leu</sup> (AAG) and -(UAG)            | 5'biotin-CAGCGCCTTAGACCGCTCGGCCACGCTACC  |
| tRNA <sup>Leu</sup> (CAG)                       | 5'biotin-CAGCGCCTTAGACCGCTCGGCCATCCTGAC  |
| tRNA <sup>Pro</sup> (AGG), -(CGG)<br>and -(UGG) | 5'biotin-GCGAGAATCATAACCCCTAGACCAACGAGCC |
| tRNA <sup>Trp</sup> (CCA)                       | 5'biotin-TCAGACGCGCTACCATTGCGCCACGAGGTC  |
| tRNA <sup>Phe</sup> (GAA)                       | 5'biotin-CTAACGCTCTCCCAACTGAGCTATTTGCGC  |
| tRNA <sup>Tyr</sup> (AUA)                       | 5'biotin-CCTCTGCTCTACCAGCTGAACTATTGAAGG  |
| tRNA <sup>Tyr</sup> (GUA)                       | 5'biotin-CCTCCGCTCTACCAACTGAGCTATCGAAGG  |
| elongator tRNA <sup>Met</sup> (CAU)             | 5'biotin-CTGACGCGCTACCTACTGCGCTAACGAGGC  |
| tRNA <sup>Ala</sup> (AGC)                       | 5'biotin-GCACGCGCTCTACCACTGAGCTATACCCCC  |
| tRNA <sup>Gly</sup> (GCC)                       | 5'biotin-GCGAGAATTCTACCACTGAACCACCCATGC  |
| tRNA <sup>Gly</sup> (CCC)                       | 5'biotin-TCTTGCATGATAACCACTACACCAGCGGCGC |
| tRNA <sup>Gln</sup> (UUG)                       | 5'biotin-CCAGAGTGCTAACCATTACACCATGGGGCC  |
