# Supplementary material for: Intellectual disability‐associated gene ftsj1 is responsible for 2′‐O‐methylation of specific tRNAs
Source: PubMed Central journal article supplement (PMC7403668; doi:10.15252/embr.202050095), 2020-06-18
Supplement: EMBR-21-e50095-s002.pdf [file EMBR-21-e50095-s002.pdf]

# Expanded View Figures

## hFTSJ1/Trm7/*E. coli* FTSJ

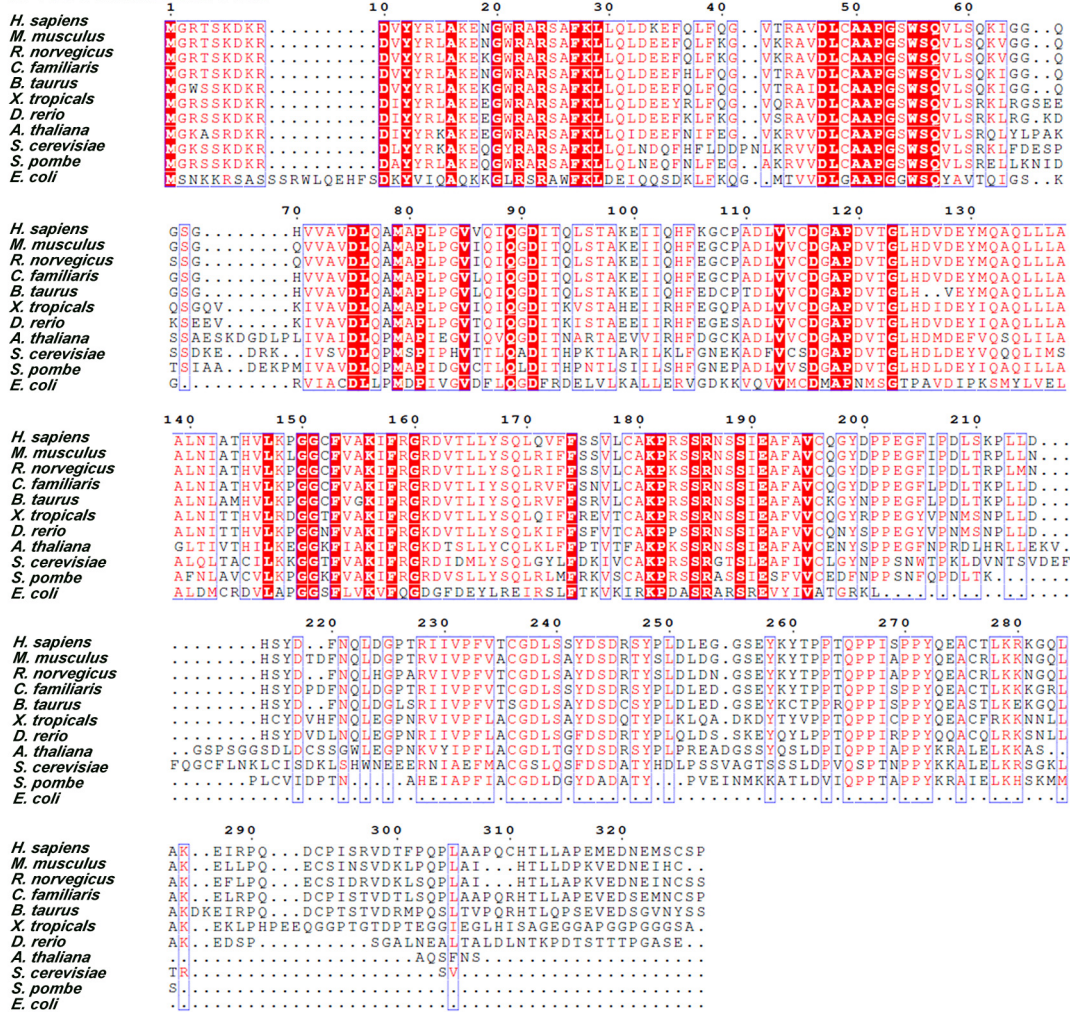

**Figure EV1.** Sequence alignments of human FTSJ1, eukaryotic Trm7, and *E. coli* FTSJ/RrmJ.

*H. sapiens*, Homo sapiens; *M. musculus*, *Mus musculus*; *R. norvegicus*, *Rattus norvegicus*; *C. familiaris*, *Canis familiaris*; *B. taurus*, *Bos taurus*; *X. tropicalis*, *Xenopus tropicalis*; *D. rerio*, *Danio rerio*; *A. thaliana*, *Arabidopsis thaliana*; *S. cerevisiae*, *Saccharomyces cerevisiae*; *S. pombe*, *Schizosaccharomyces pombe*; *E. coli*, *Escherichia coli*.

Source data are available online for this figure.

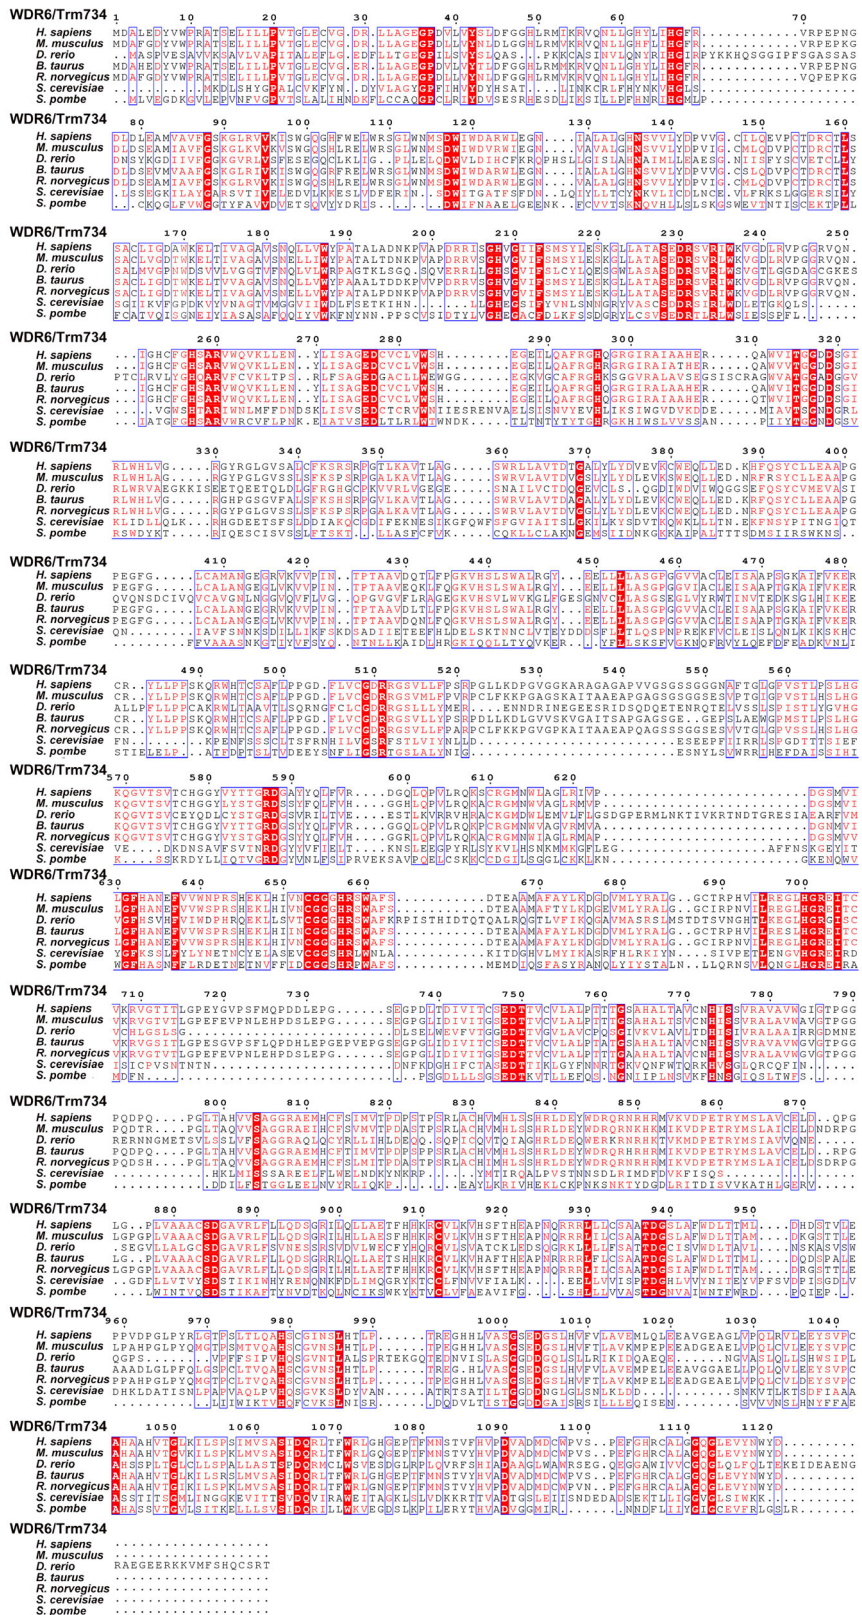

Figure EV2. Sequence alignments of WDR6 or Trm734 from different species.

*S. cerevisiae* and *S. pombe* contain Trm734, the auxiliary protein for Trm7. Some higher eukaryotes, such as *H. sapiens*, *M. musculus*, *D. rerio*, *B. taurus*, and *R. norvegicus*, contain the Trm734 homolog, WDR6.

Source data are available online for this figure.

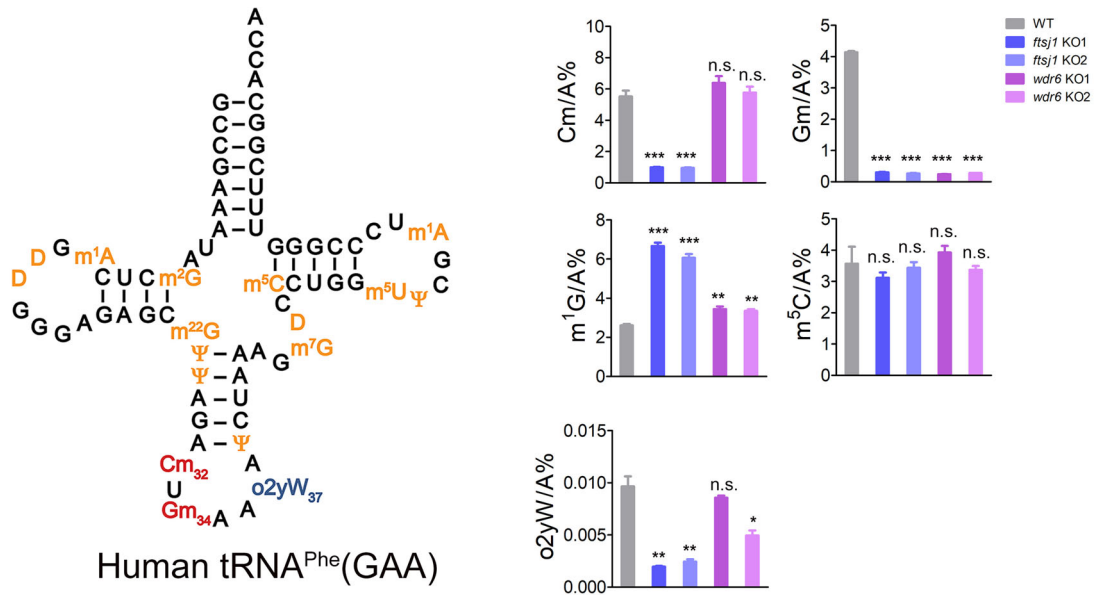

**Figure EV3. Knockout of *ftsj1* and/or *wdr6* affects Cm<sub>32</sub>, Gm<sub>34</sub>, m<sup>1</sup>G<sub>37</sub>, and o<sup>2</sup>yW<sub>37</sub> levels of tRNA<sup>Phe</sup>(GAA).**

Quantification of the Cm/A, Gm/A, m<sup>1</sup>G/A, m<sup>5</sup>C/A, and o<sup>2</sup>yW/A ratios in endogenous tRNA<sup>Phe</sup>(GAA) isolated from WT, *ftsj1* KO, and *wdr6* KO cell lines by UPLC-MS/MS analysis. Error bars represent the standard deviation of three independent experiments. *P* values were determined using two-tailed Student's *t*-test for paired samples. \**P* < 0.05, \*\**p* < 0.01, \*\*\**p* < 0.001. n.s., no significance.

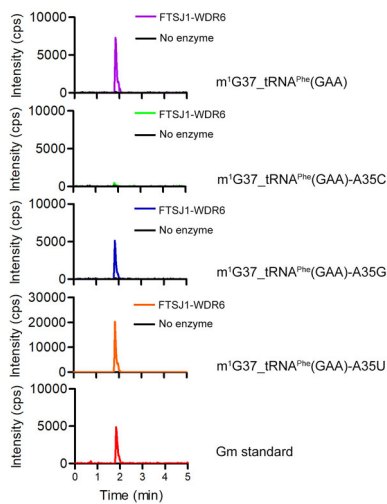

**Figure EV4. UPLC-MS/MS analysis of Gm<sub>34</sub> of m<sup>1</sup>G<sub>37</sub>-tRNA<sup>Phe</sup>(GAA), m<sup>1</sup>G<sub>37</sub>-tRNA<sup>Phe</sup>(GAA)-A35C, m<sup>1</sup>G<sub>37</sub>-tRNA<sup>Phe</sup>(GAA)-A35G and m<sup>1</sup>G<sub>37</sub>-tRNA<sup>Phe</sup>(GAA)-A35U after incubation with or without FTSJ1-WDR6.** 2 μl of Gm standard (1 ng/ml) was loaded as control. cps, counts per second.

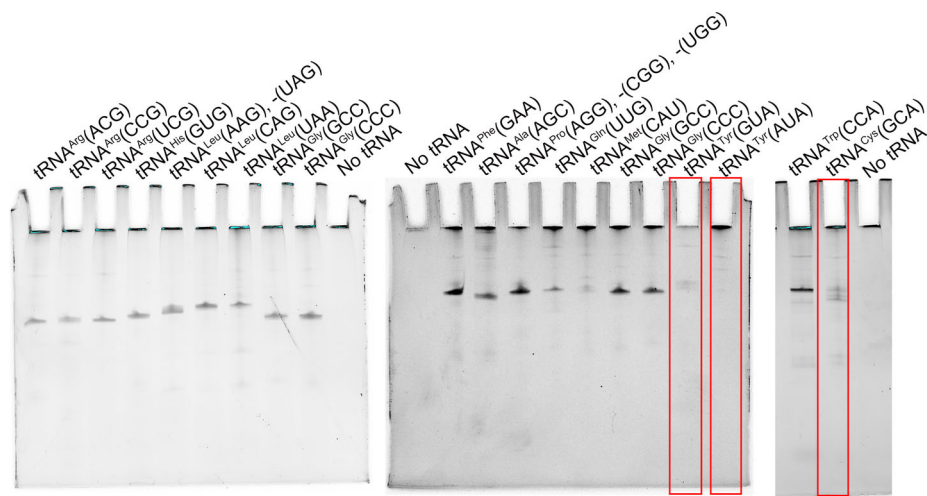

**Figure EV5.** Analysis of the purity of the fished tRNAs by biotinylated DNA probes using urea PAGE.

Among them, tRNA<sup>Cys</sup>(GCA), tRNA<sup>Tyr</sup>(GUA), or tRNA<sup>Tyr</sup>(AUA) could not be purified (in red box).
